# Supplementary material for: MYSM1 acts as a novel co-activator of ERα to confer antiestrogen resistance in breast cancer
Source: PubMed Central journal article supplement (PMC10883278; doi:10.1038/s44321-023-00003-z), 2023-12-15
Supplement: 44321_2023_3_MOESM1_ESM.pdf [file 44321_2023_3_MOESM1_ESM.pdf]

## **Appendix Table of Contents**

1. Appendix Fig S1
2. Appendix Fig S1 legends
3. Appendix Fig S2
4. Appendix Fig S2 legends

# Appendix Fig S1

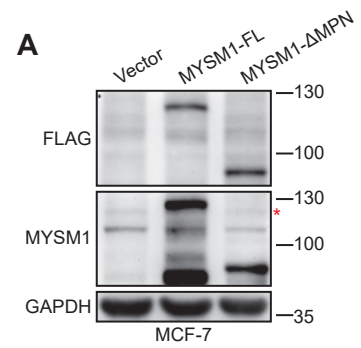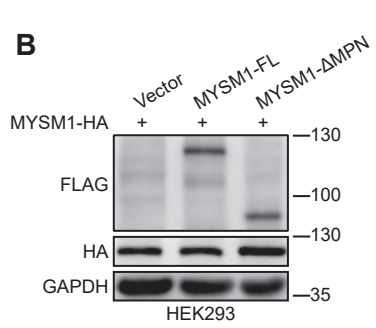

**Appendix Figure S1. MYSM1 has no effect on its own protein expression**

A. Western blot detecting endogenous MYSM1 expression in MCF-7 cells transfected with PcDNA3.1/MYSM1/MYSM1-ΔMPN expression plasmids.

B. Immunoblot of exogenous MYSM1 expression using the HA antibodies in PcDNA3.1/MYSM1/MYSM1-ΔMPN overexpressed HEK293 cells.

# Appendix Fig S2

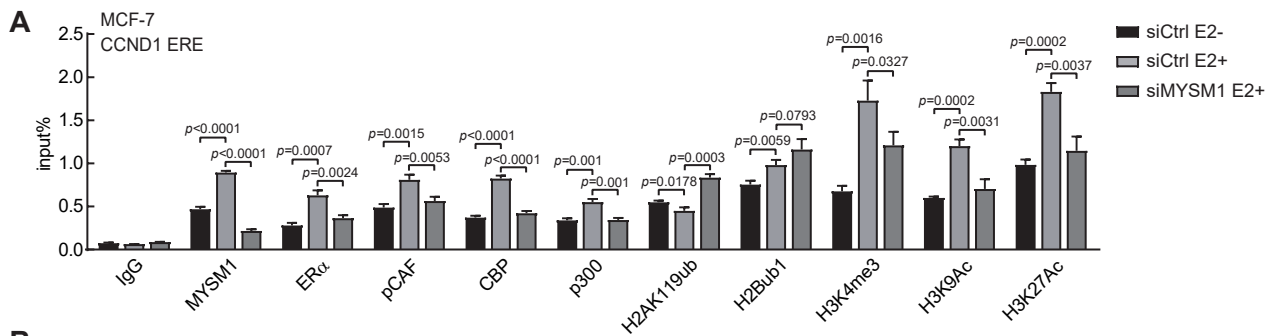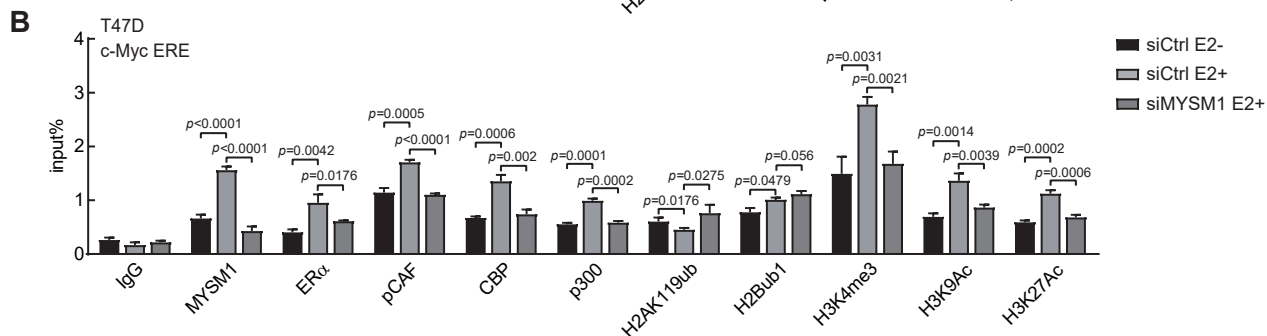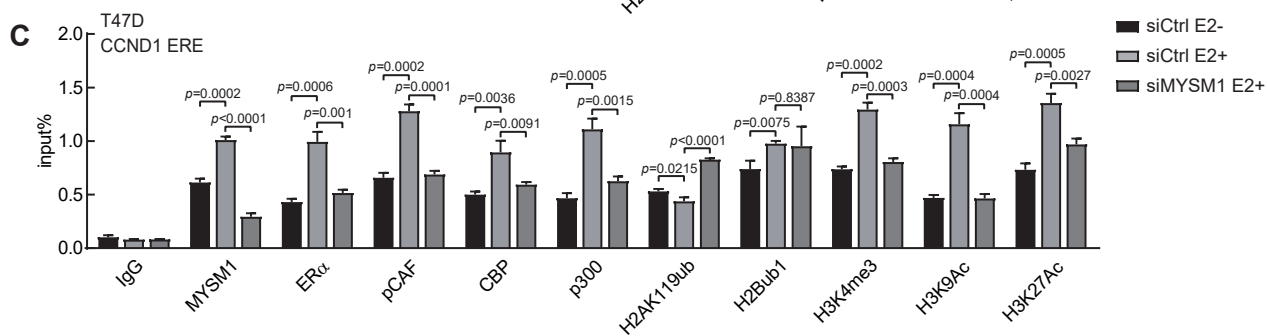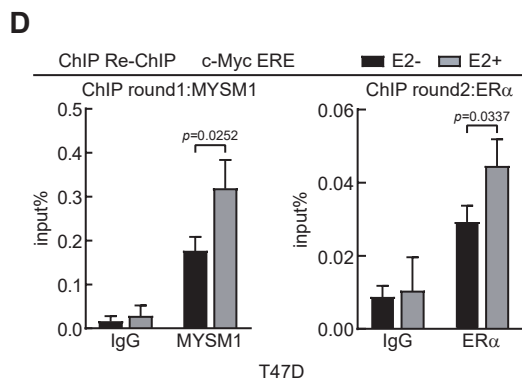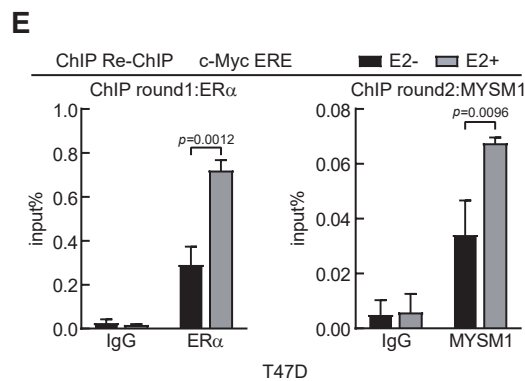

**Appendix Figure S2. MYSM1 facilitates the recruitment of ER $\alpha$  and HAT complex at the *cis* elements of ER $\alpha$  target genes in MCF-7 cells**

A. ChIP assays via designated antibodies to elaborate the influence of MYSM1 regarding to ER $\alpha$  recruitment and relative histone modifications on *CCND1* ERE in MCF-7 cells (mean  $\pm$  SD; Student *t*-test).

B, C. ChIP analysis was conducted with specific antibodies in MYSM1-deficiency T47D cells on the promoter region of *c-Myc* (B) or *CCND1* (C) with or without E2 (mean  $\pm$  SD; Student *t*-test).

D, E. ChIP re-ChIP assay was performed with the indicated antibodies in T47D cells (mean  $\pm$  SD; Student *t*-test).
